# Supplementary material
Source: MDPI journal article supplement (https://www.mdpi.com/2073-4352/9/6/278)
Supplement: s1 [file s1]

# Magnetic Properties and Magnetocaloric Effect in Gd<sub>100-x</sub>Co<sub>x</sub> Thin Films

Mohamed Tadout, Charles-Henri Lambert, Mohammed Salah El Hadri, Abdelilah Benyoussef, Mohammed Hamedoun, Mohammed Benaissa, Omar Mounkachi and Stephane Mangin

## Supplementary information

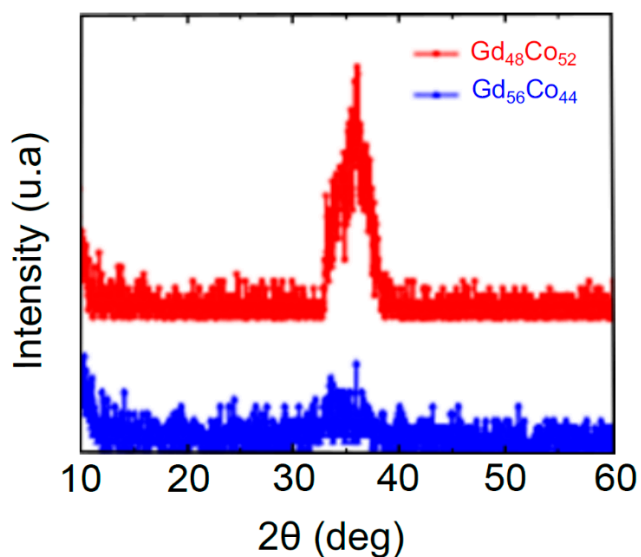

**Supplemental figure 1:** XRD patterns of the Gd<sub>100-x</sub>Co<sub>x</sub> alloys, where  $x = 52$  and  $44$ . Only one broad hump was observed between  $30^\circ$  and  $40^\circ$   $2\theta$  on each pattern, which indicates that the studied Gd<sub>100-x</sub>Co<sub>x</sub> alloys primarily consist of an amorphous phase.
